# Supplementary material for: Tertiary lymphoid structures in the choroid plexus in neuropsychiatric lupus
Source: JCI journal article supplement (doi:10.1172/jci.insight.124203), 2019-06-05

Figure S1: (A) A representative control MRL/+ mice typically exhibits no leukocytes within the CP aside from an occasional CD3<sup>+</sup> cell. (B) In-situ proliferation of CD4<sup>+</sup> T cells in a representative MRL/lpr CP, as demonstrated by proliferating cell nuclear antigen (PCNA) co-staining. (C) B220/GL7 co-staining cells representing GC B cells. (D) In-situ proliferating PCNA<sup>+</sup> B cells. (E) Interspersed cellular PNAd staining, indicative of post translational modification of receptor proteins for CD62L. (F) Immunofluorescent staining revealed CD4<sup>+</sup> T cells expressing BCL6, which is the transcription factor driving T<sub>fh</sub> cell differentiation. (G) Differential expression heatmap of genes associated with specialization of HEVs. All scale bars in this figure are 50  $\mu$ m.

# Supplemental Figure 1

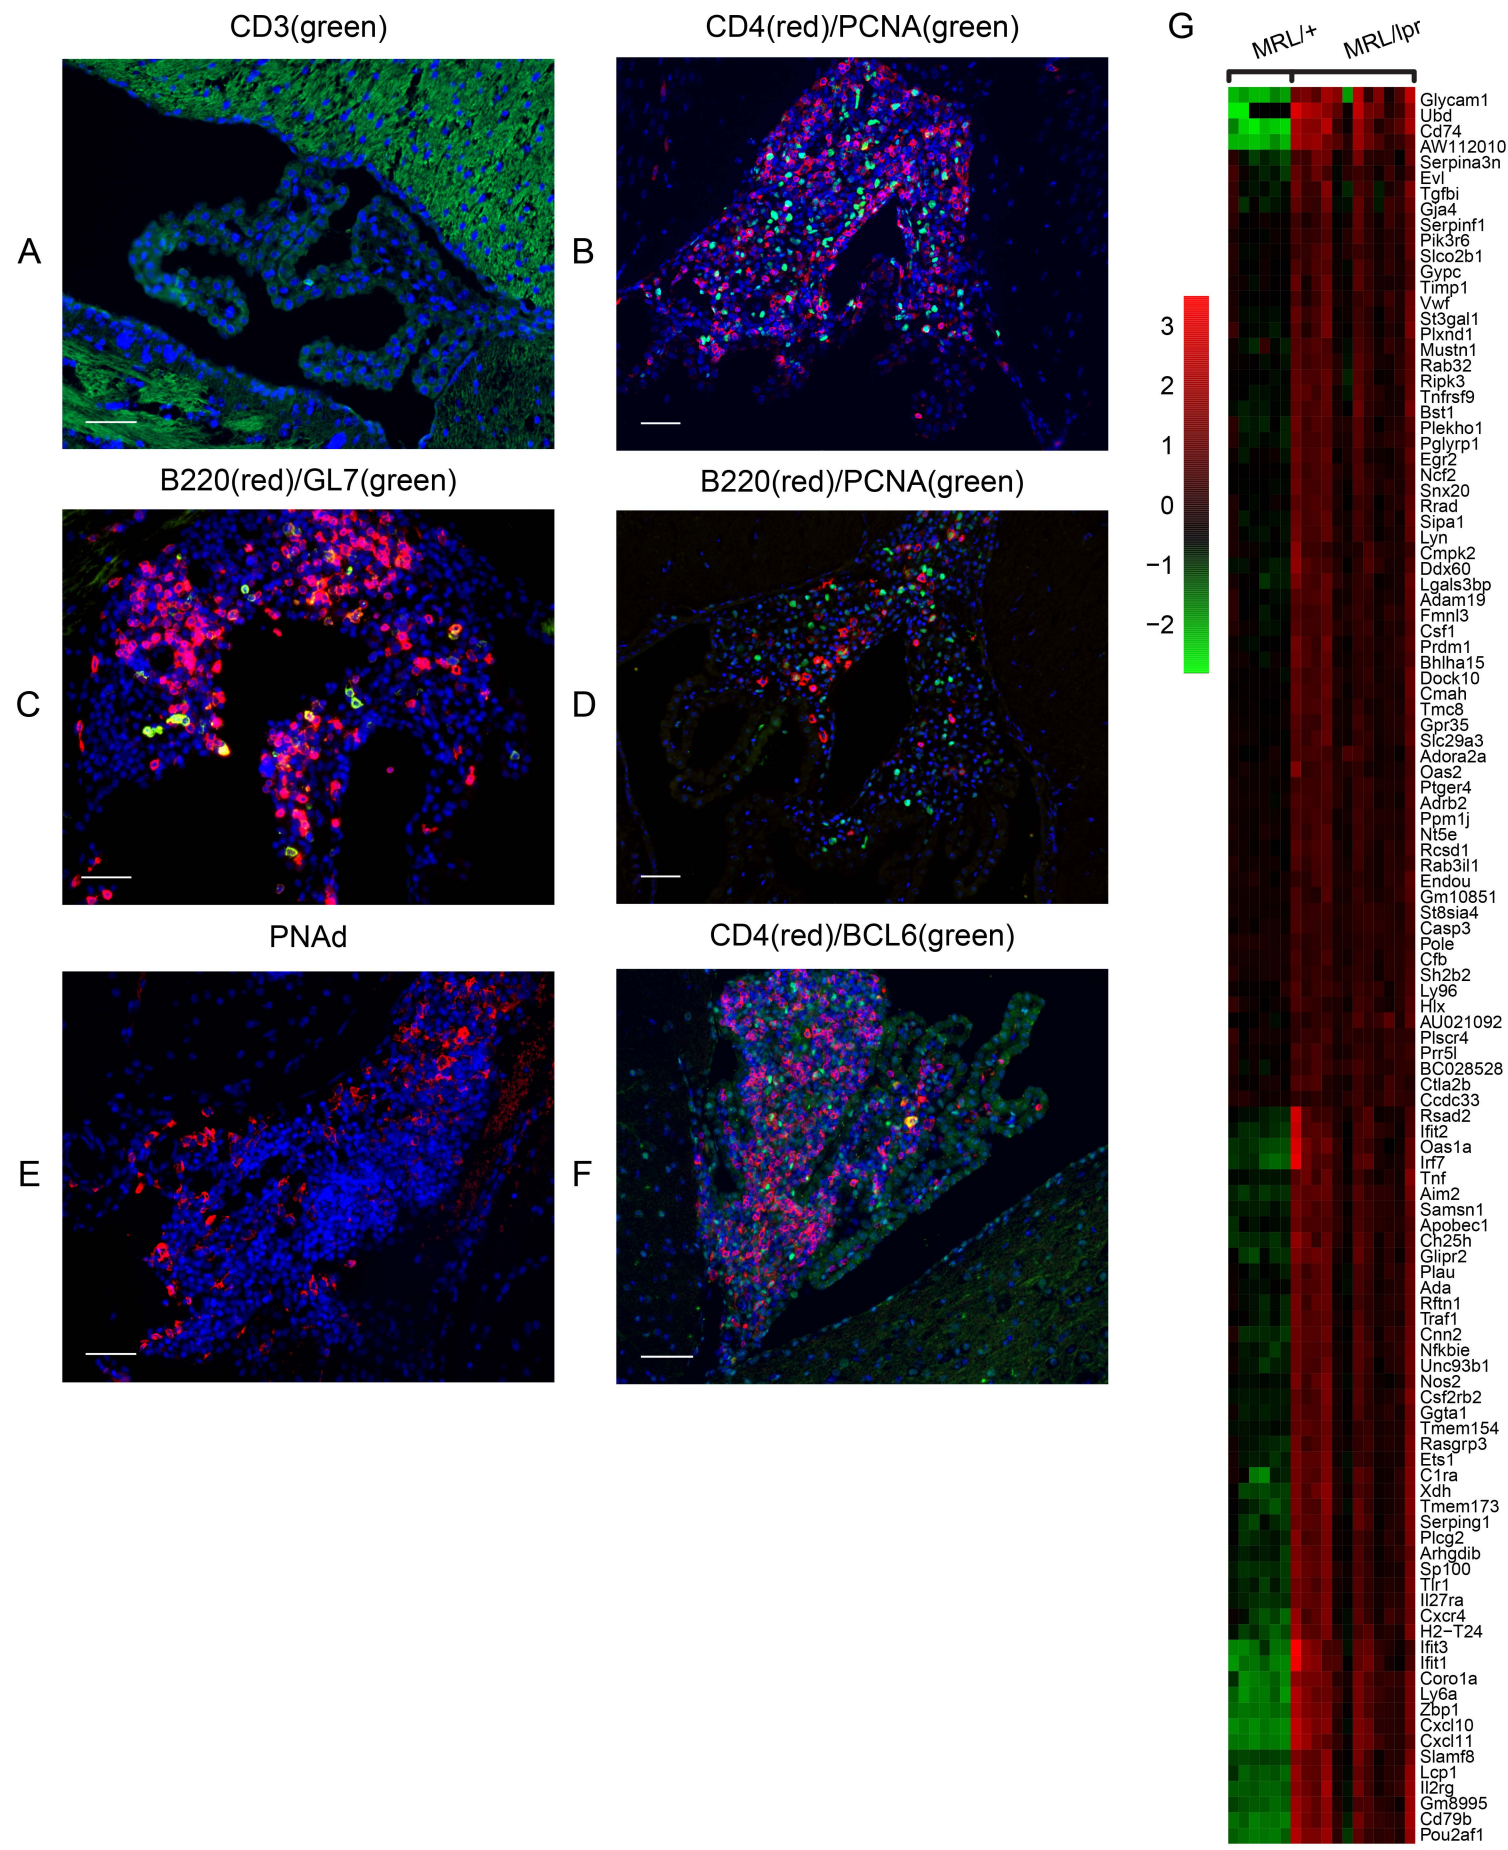

Supplement: sd1 [file 1]
